# Supplementary material for: Preventive Effects of Heat-Killed Enterococcus faecalis Strain EC-12 on Mouse Intestinal Tumor Development
Source: PubMed Central journal article supplement (PMC5412410; doi:10.3390/ijms18040826), 2017-04-13
Supplement: ijms-18-00826-s001.pdf [file ijms-18-00826-s001.pdf]

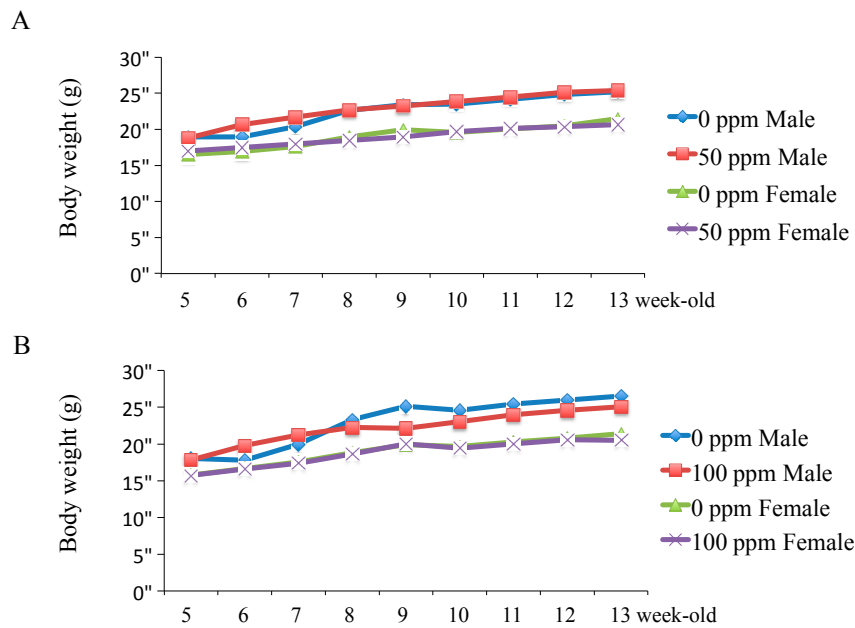

**Figure S1.** Body weight change during EC-12 administration in Min mice.

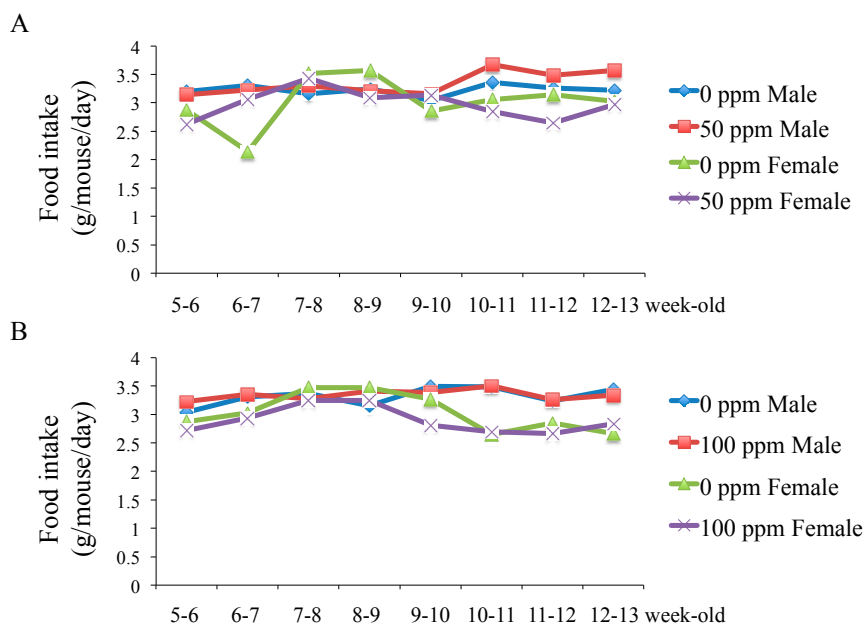

**Figure S2.** Food intake amount of mouse per day in the experimental period.
